# Supplementary material for: Hypoculoside, a sphingoid base-like compound from Acremonium disrupts the membrane integrity of yeast cells
Source: PubMed Central journal article supplement (PMC6345779; doi:10.1038/s41598-018-35979-z), 2019-01-24
Supplement: 41598_2018_35979_MOESM1_ESM.pdf [file 41598_2018_35979_MOESM1_ESM.pdf]

**Hypoculoside, a sphingoid base-like compound from *Acremonium* disrupts the membrane integrity of yeast cells**

**Mohammad Alfatah<sup>1</sup>, Jin Huei Wong<sup>1</sup>, Choy Eng Nge<sup>1</sup>, Kiat Whye Kong<sup>2</sup>, Kia Ngee Low<sup>1</sup>, Chung Yan Leong<sup>1</sup>, Sharon Crasta<sup>1</sup>, Madhaiyan Munusamy<sup>1</sup>, Amanda Mun Leng Chang<sup>1</sup>, Shawn Hoon<sup>2</sup>, Siew Bee Ng<sup>1\*</sup>, Yoganathan Kanagasundaram<sup>1\*</sup> and Prakash Arumugam<sup>1\*</sup>**

1. Bioinformatics Institute, 30 Biopolis Street, #07-01, Matrix, Singapore 138671
2. Molecular Engineering Laboratory, 61 Biopolis Drive, #03-12 Proteos, Singapore 13867

\*To whom correspondence must be addressed

Email: prakasha@bii.a-star.edu.sg , yoganathank@bii.a-star.edu.sg and ngsb@bii.a-star.edu.sg

## Legends for Supplementary figures and tables

### Figure S1 Analysis of hypoculoside by MS/MS

Collision-Induced dissociation (CID) MS/MS fragmentation spectra of hypoculoside (**8**) generated at energies of 10 eV, 20 eV and 40 eV are depicted in panels A, B and C respectively.

### Figure S2 Hypoculoside has antifungal, antibacterial and mammalian cytotoxic activities.

- A. Logarithmically growing *Candida albicans* cells were exposed to hypoculoside and amphotericin B at the indicated concentrations in triplicates in a 96-well microplate. A picture of the microplate after 24 hours of incubation at 30 °C is shown. Absorbance data for the experiment is displayed in Fig. 2C.
- B. *Saccharomyces cerevisiae* cultures in duplicate were treated with hypoculoside at the indicated concentrations in YPD medium at 30 °C for 24 hours. Growth of the yeast cultures as measured by OD<sub>600 nm</sub> is plotted against hypoculoside concentration. Yeast cells treated with either DMSO or 21 μM hypoculoside for 24 hours were then washed in YPD and plated at different dilutions on a YPD agar and incubated at 30 °C. The YPD agar plate was photographed after 2 days.
- C. Growth inhibition data of hypoculoside against three bacterial strains *Staphylococcus aureus* (ATCC 25923), *Pseudomonas aeruginosa* (ATCC 9027) and *Klebsiella aerogenes* (ATCC 13048) are presented. Percentage growth is plotted against log (concentration of hypoculoside in μM).

D. Cytotoxicity data of hypoculoside against the A549, MIA PaCa-2 and PANC-1 mammalian cell lines obtained using the PrestoBlue™ cell viability reagent are presented. Percentage growth is plotted against log (concentration of hypoculoside in  $\mu\text{M}$ ).

**Figure S3**  $^1\text{H}$  NMR spectrum (methanol- $d_4$ , 400 MHz) of hypoculoside (8)

**Figure S4**  $^{13}\text{C}$  NMR spectrum (methanol- $d_4$ , 100 MHz) of hypoculoside (8)

**Figure S5** HSQC spectrum (methanol- $d_4$ , 400 MHz) of hypoculoside (8)

**Figure S6** COSY spectrum (methanol- $d_4$ , 400 MHz) of hypoculoside (8)

**Figure S7** HMBC spectrum (methanol- $d_4$ , 400 MHz) of hypoculoside (8)

**Figure S8**  $^1\text{H}$  NMR spectrum (methanol- $d_4$ , 400 MHz) of hypoculine (9)

**Figure S9**  $^{13}\text{C}$  NMR spectrum (methanol- $d_4$ , 100 MHz) of hypoculine (9)

**Figure S10** HSQC spectrum (methanol- $d_4$ , 400 MHz) of hypoculine (9)

**Figure S11** COSY spectrum (methanol- $d_4$ , 400 MHz) of hypoculine (9)

**Figure S12** HMBC spectrum (methanol- $d_4$ , 400 MHz) of hypoculine (9)

**Figure S13 Hypoculoside but not hypoculine disrupts the vacuolar structure of yeast cells** Data from an independent experiment performed as described in Fig. 7 are presented here.

**Figure S14 Phylogenetic analysis of the hypoculoside-producing fungus F2434**

Phylogenetic Maximum Likelihood tree based on internal transcribed spacer (ITS) gene

sequences of F2434 fungus and members of the family *Plectosphaerellaceae* (consists of 11 genera). Species of the genera *Apharknessia* and *Phaeoacremonium* were used as the out-group. Bootstrap values (expressed as percentages of 500 replications) greater than 20 % are shown at the branch points. Bar indicates 0.05 substitutions per nucleotide position.

### **Supplementary Table S1 HOP data of hypoculoside and GO analysis**

Excel Worksheet 'HOP\_ Hypoculoside' contains the raw HOP data indicating the logFC values for 3702 deletion strains along with the corresponding P-value, logCPM (Counts per Million), Likelihood Ratio (LR) and False Discovery Rate (FDR).

Excel Worksheet 'P-Value <0.05, logFC<-0.5' contains the list of 336 genes that confer resistance to hypoculoside.

Excel Worksheet 'GO' (Gene Ontology) contains enrichment analysis results for 336 genes obtained using DAVID for the GO categories namely, Biological Process (BP), Cellular Component (CC) and Molecular Function (MF).

Excel Worksheet 'REVIGO' contain the REVIGO Tree analysis of the overrepresented GO terms obtained with DAVID (GO terms with a P-value<0.05).

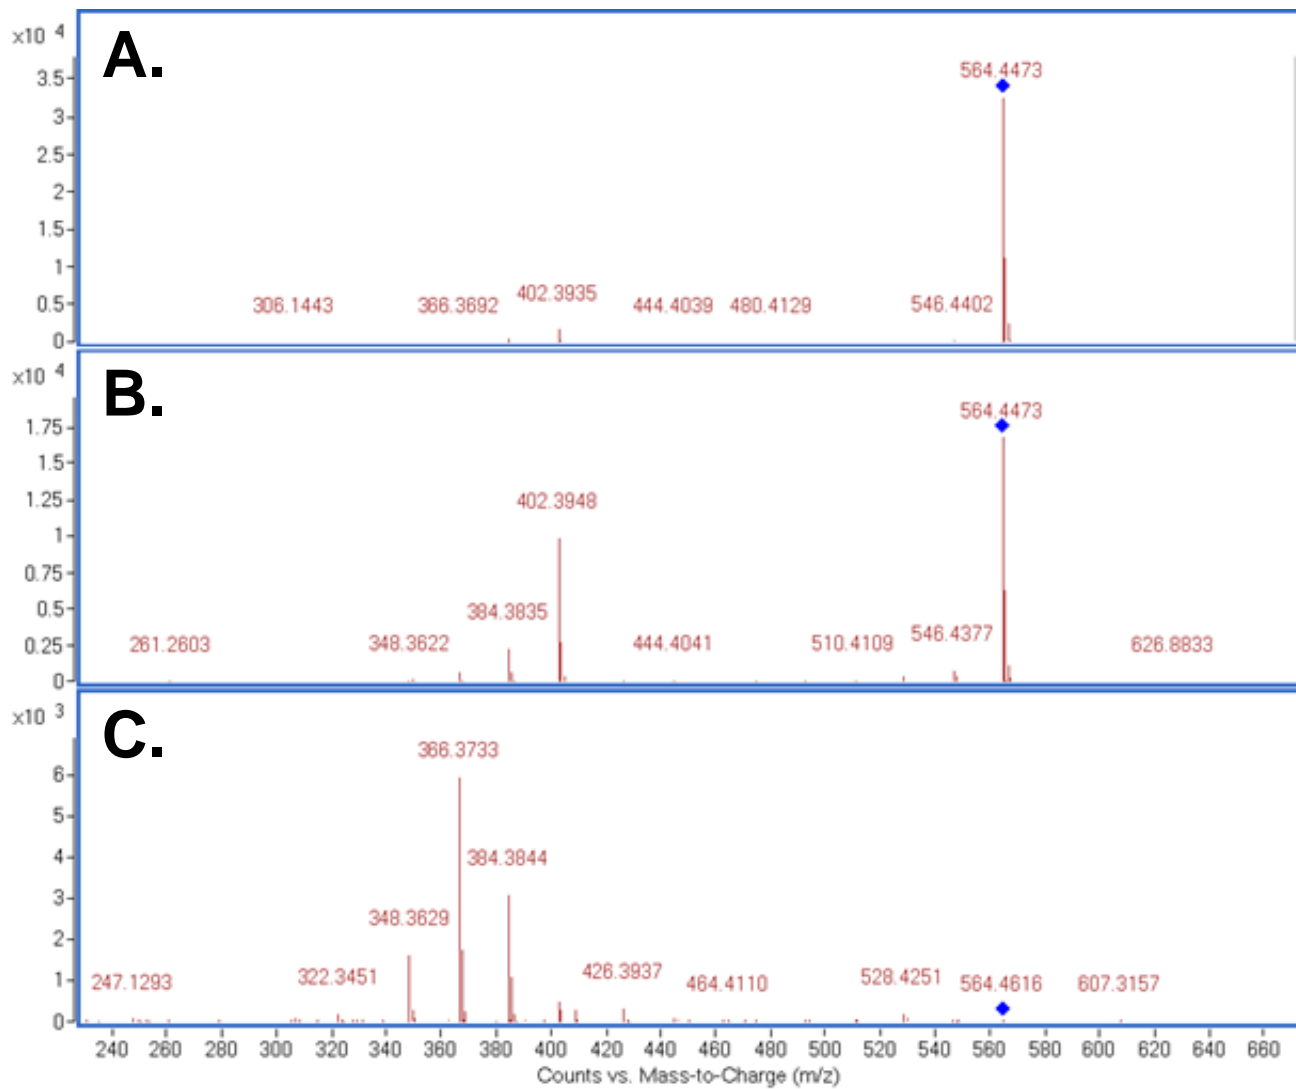

**Figure S1**

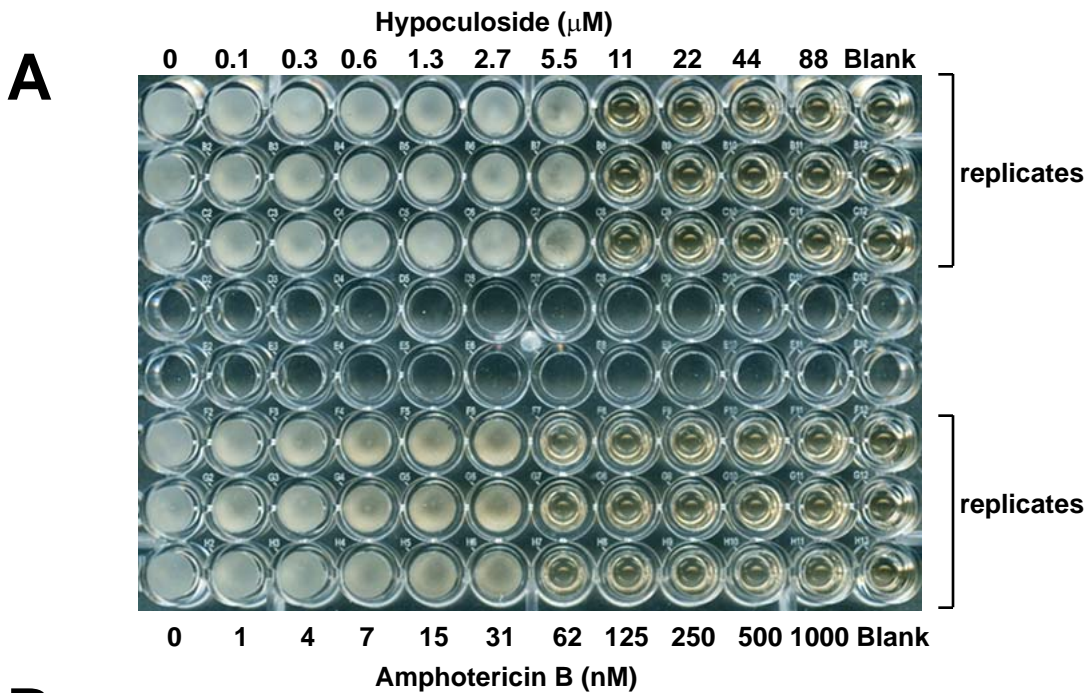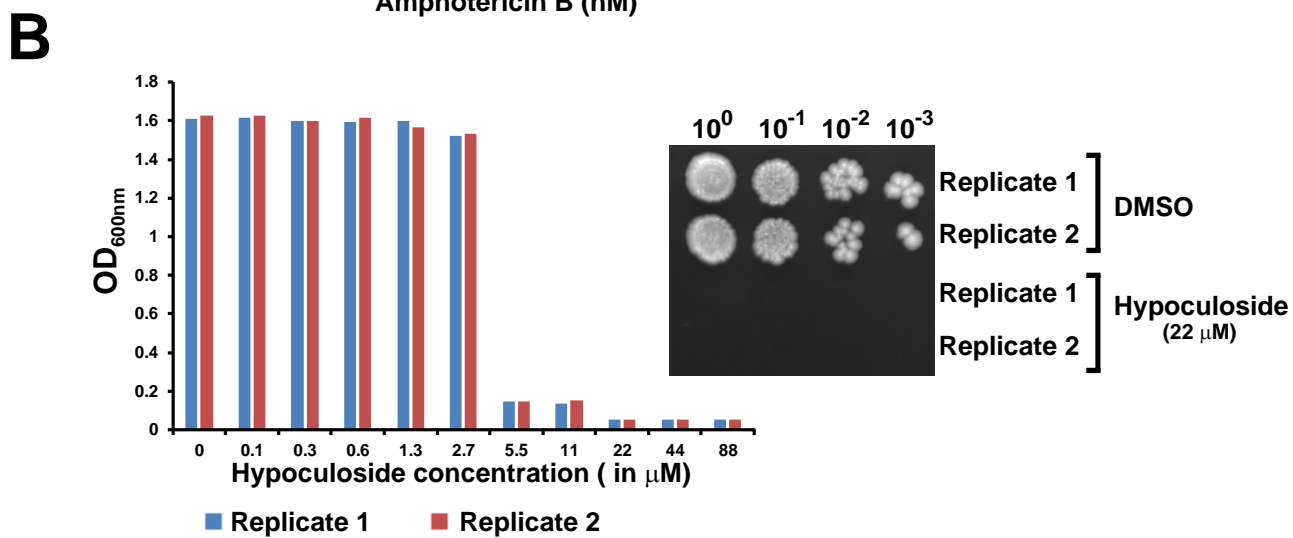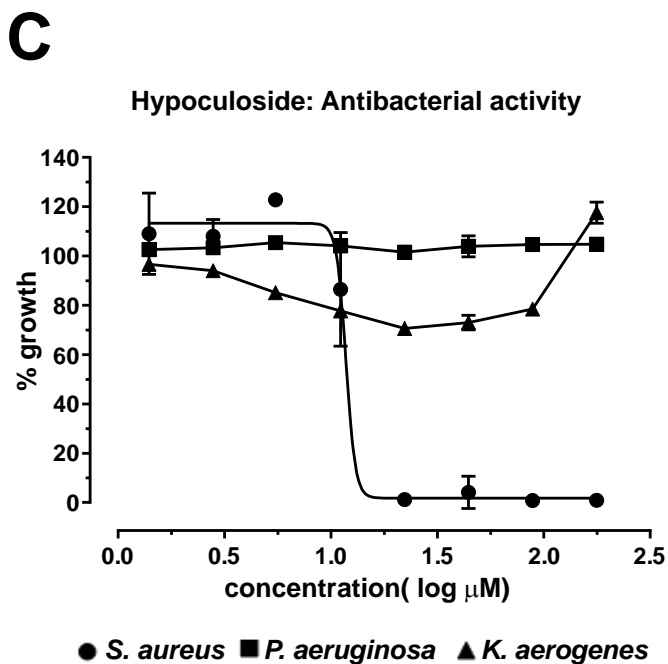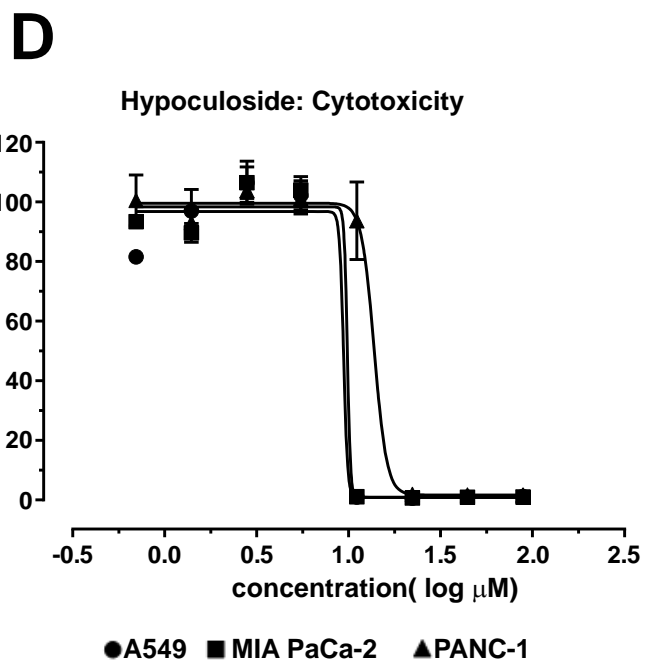

**Figure S2**

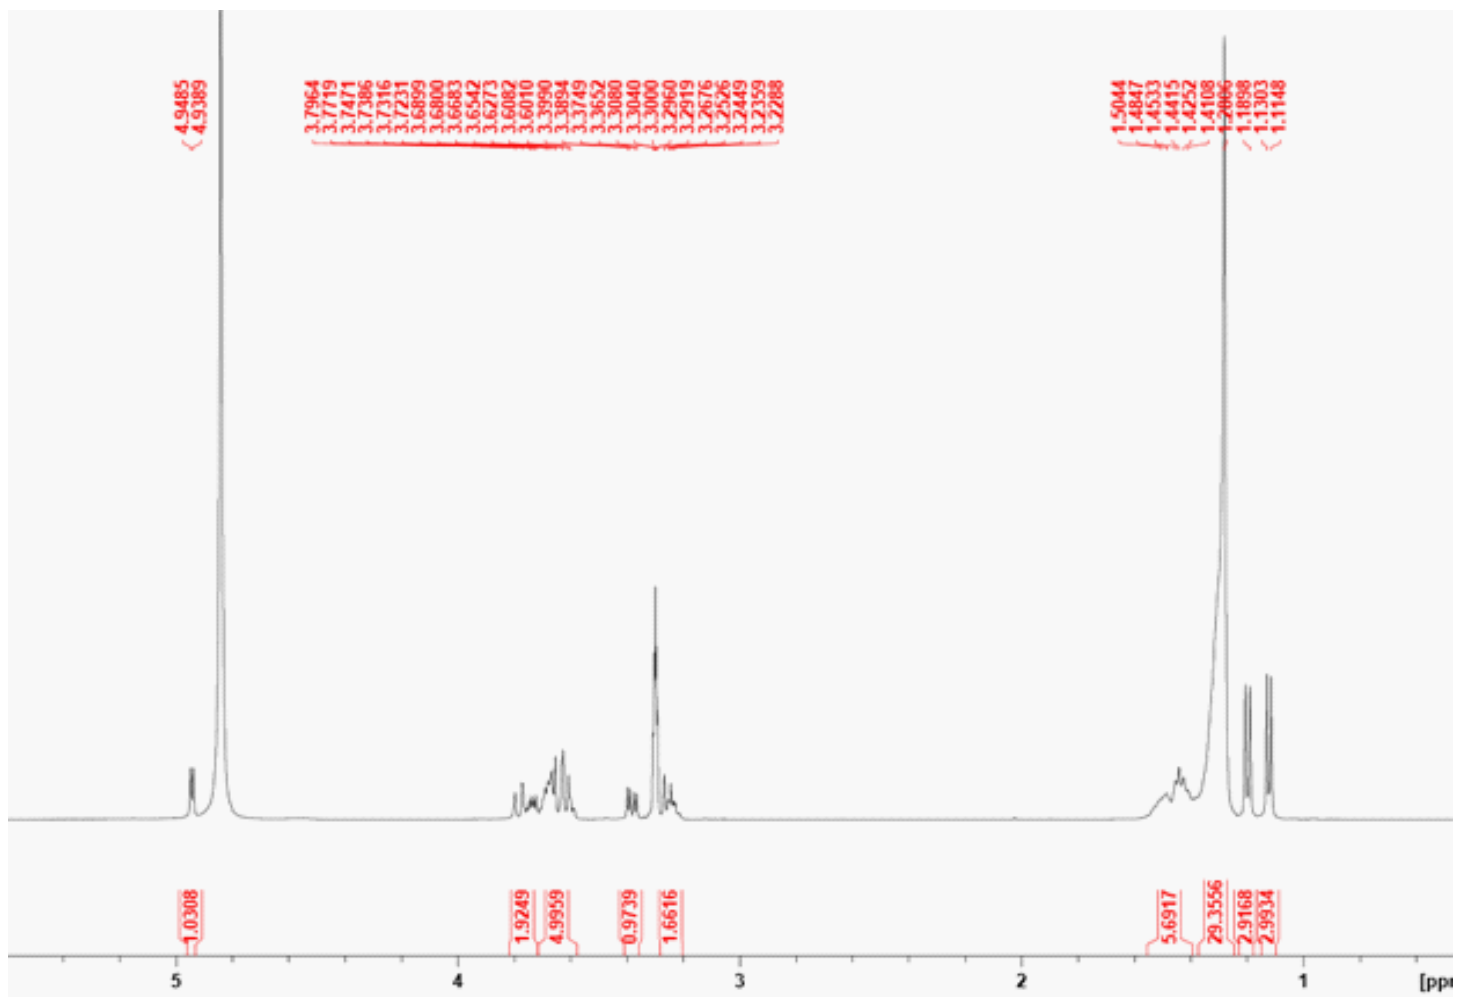

Figure S3

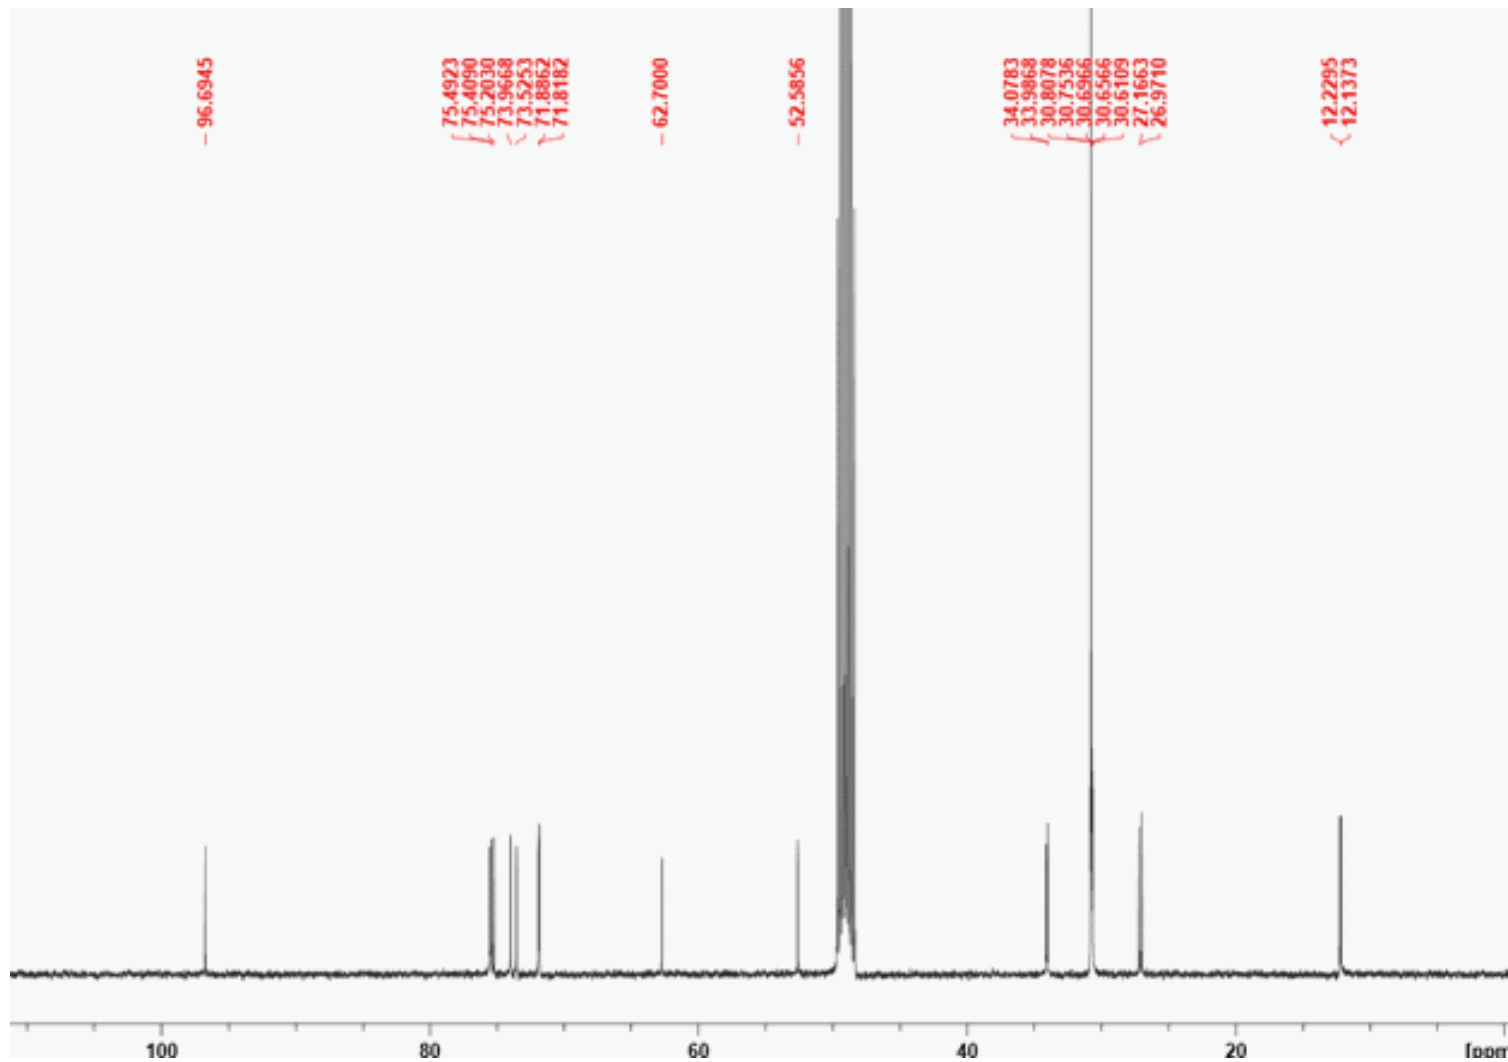

Figure S4



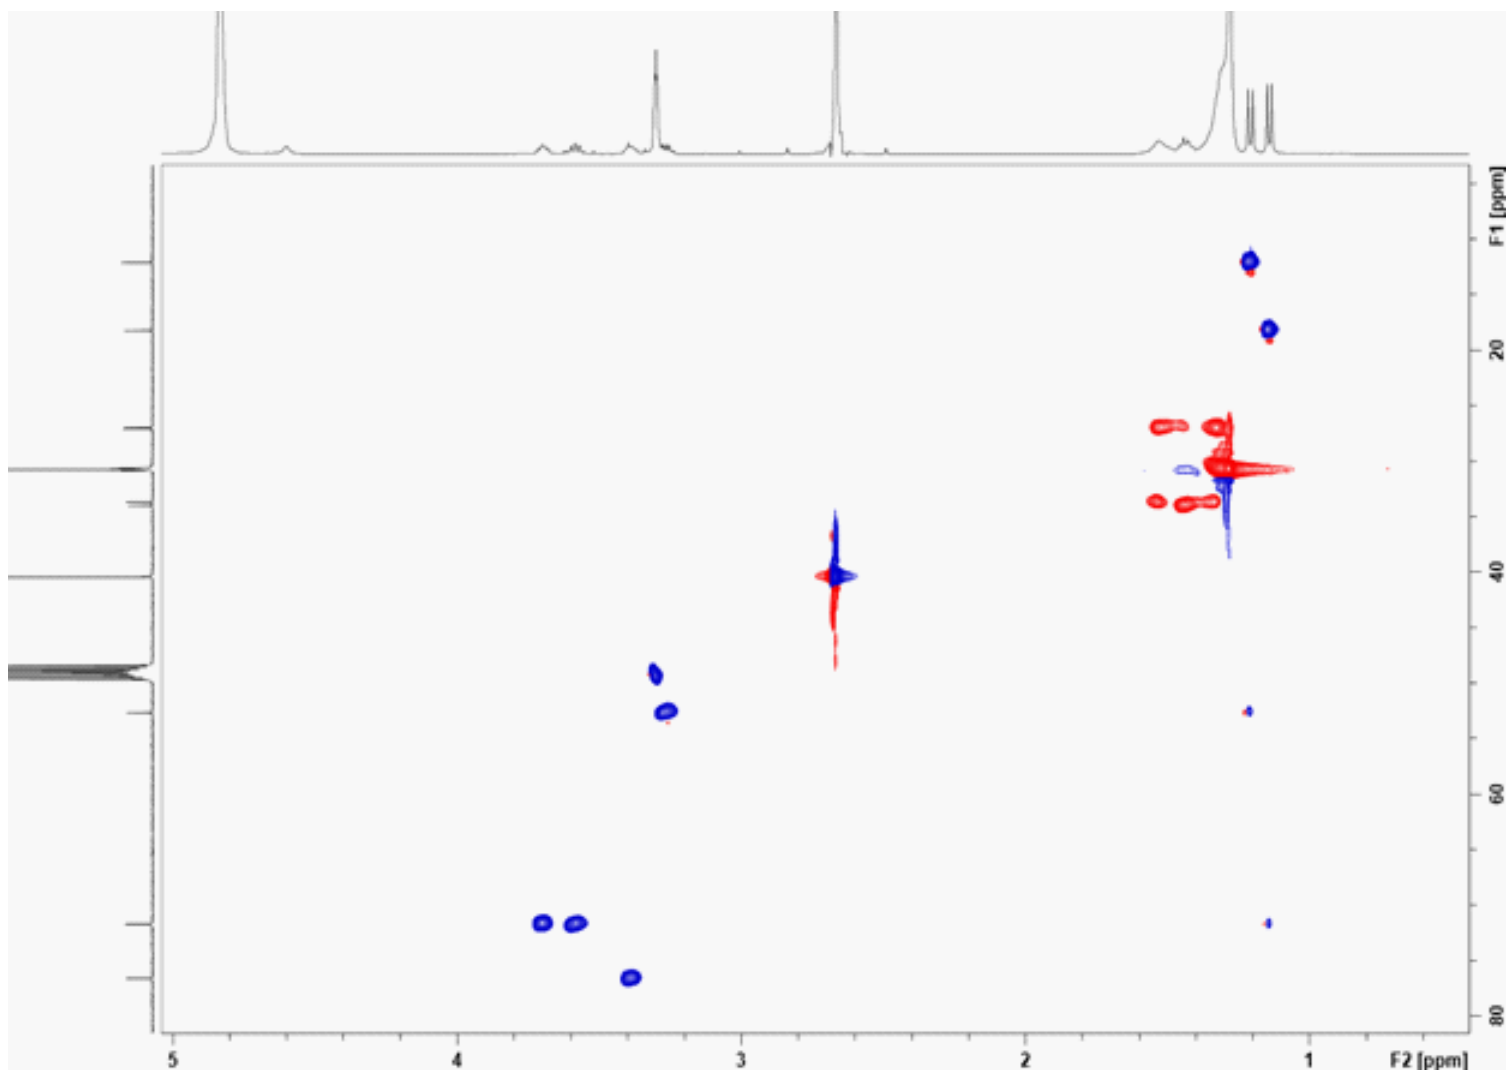

**Figure S5**

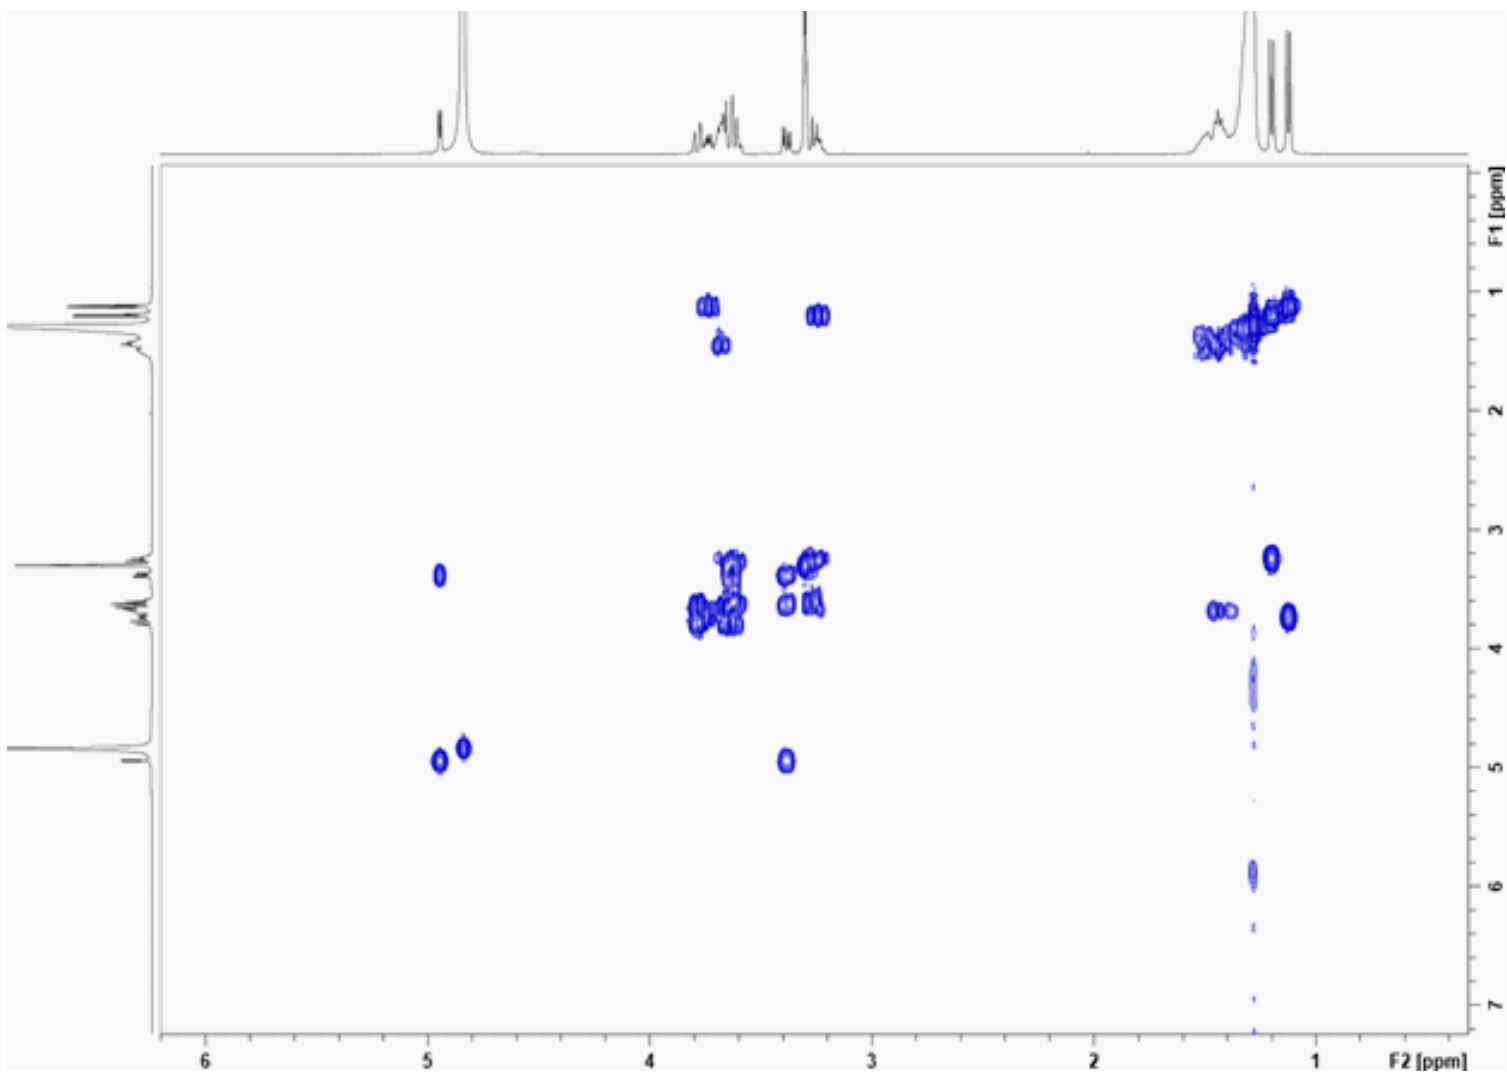

**Figure S6**

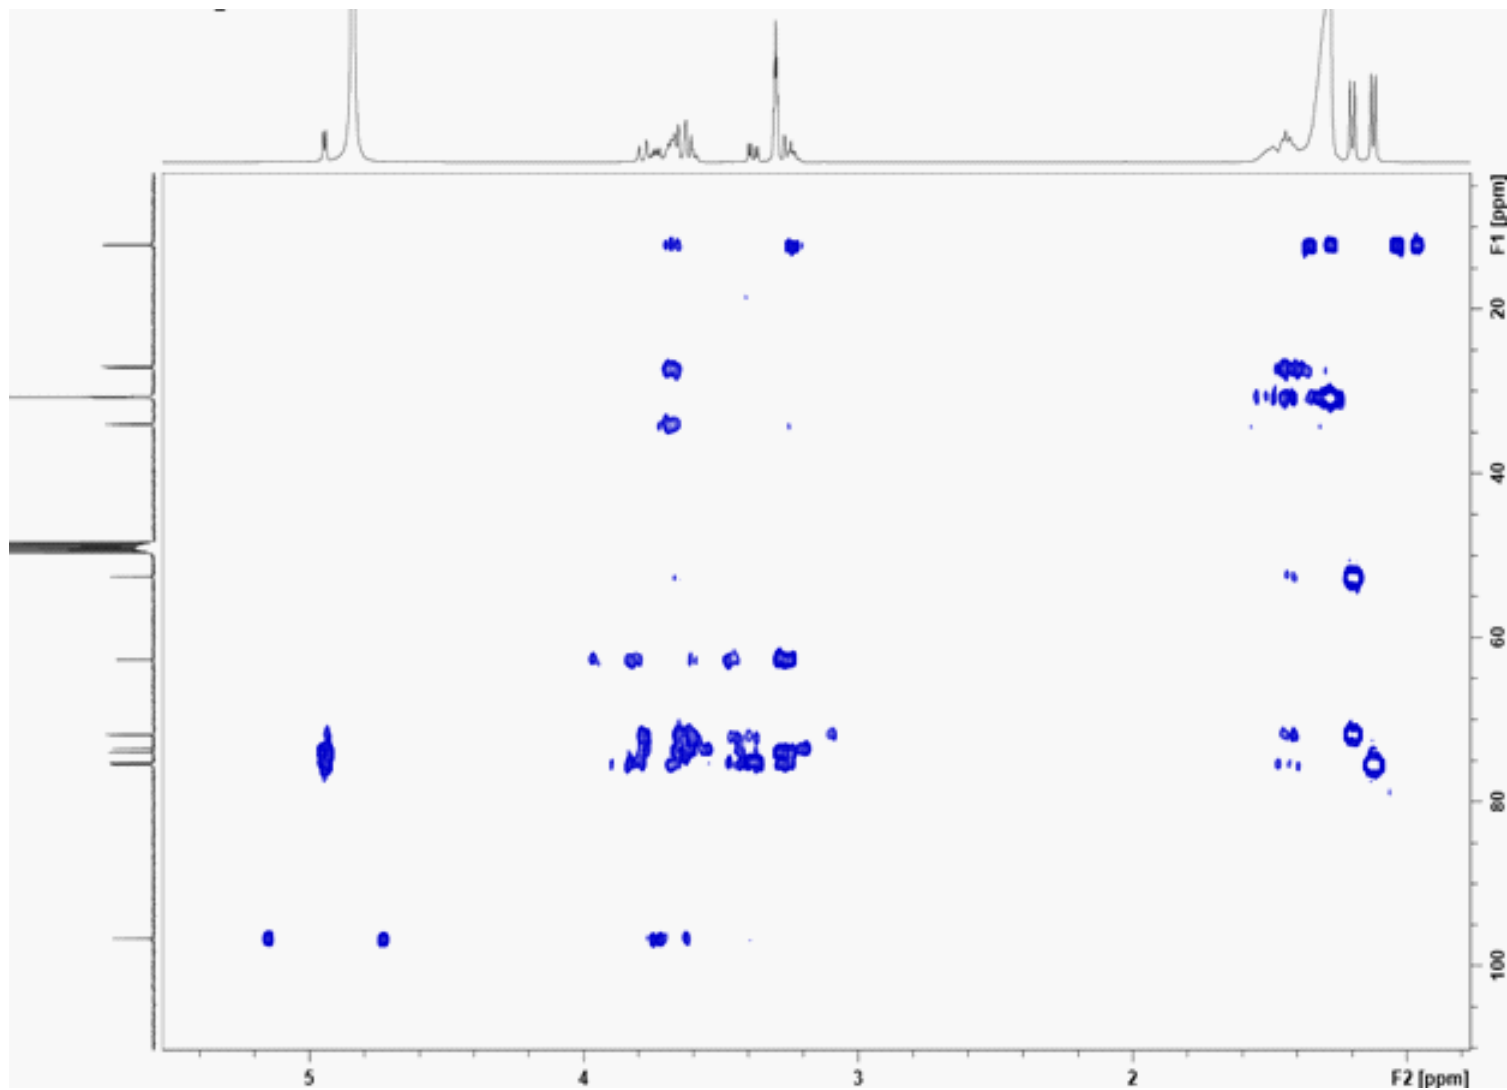

**Figure S7**

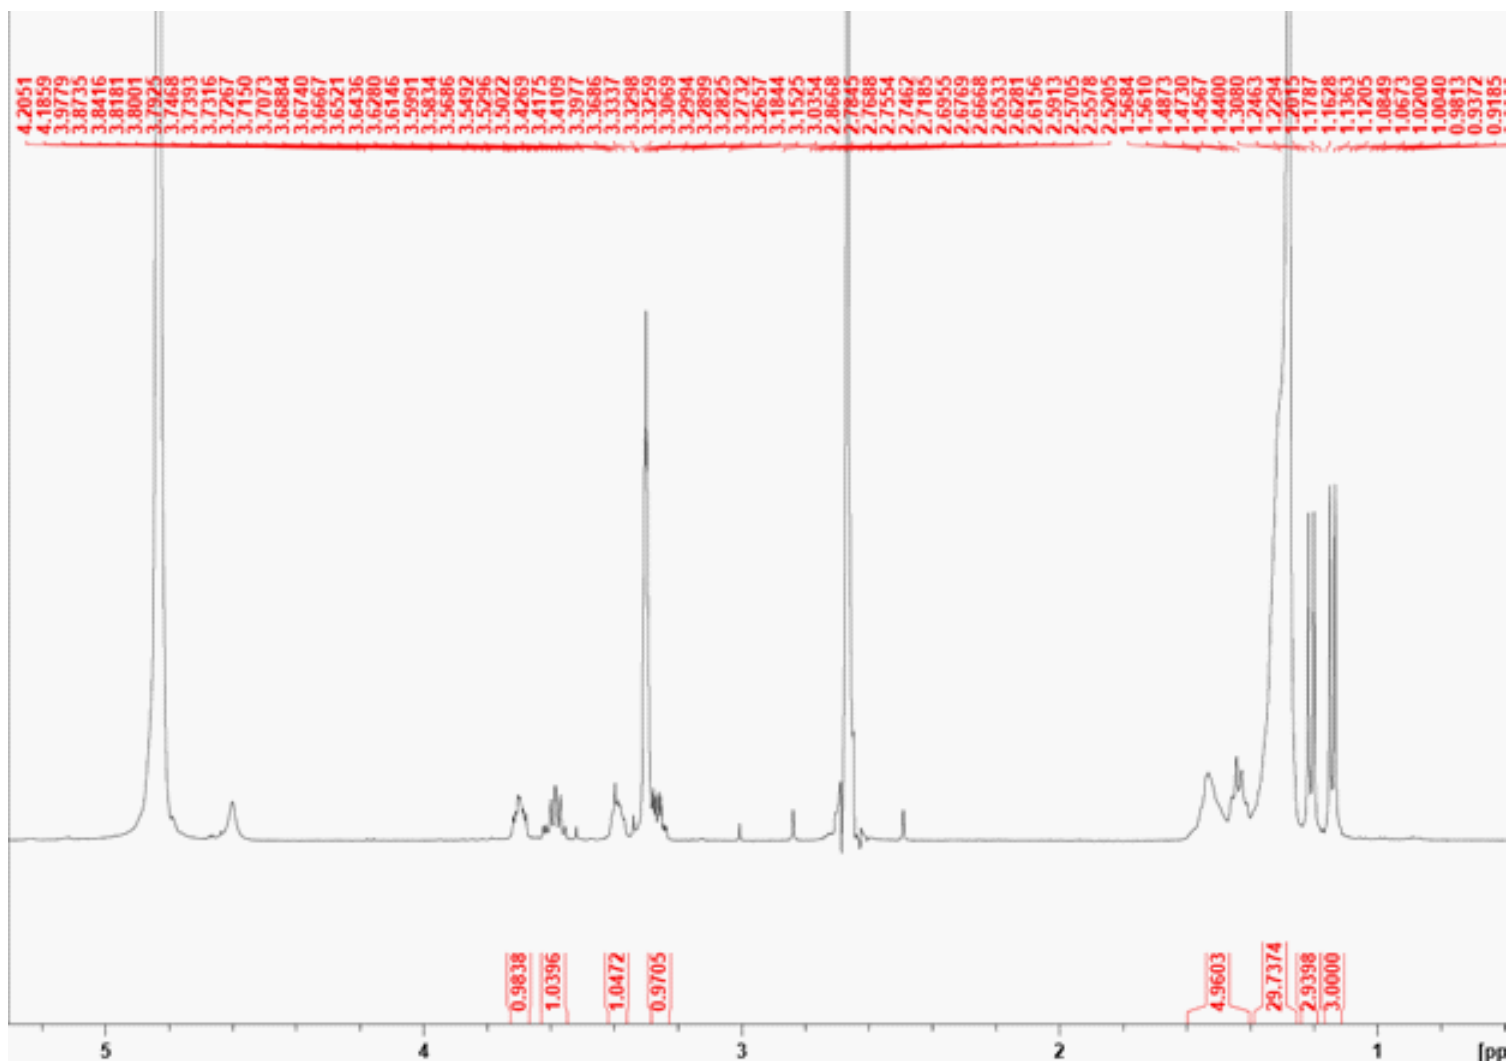

Figure S8

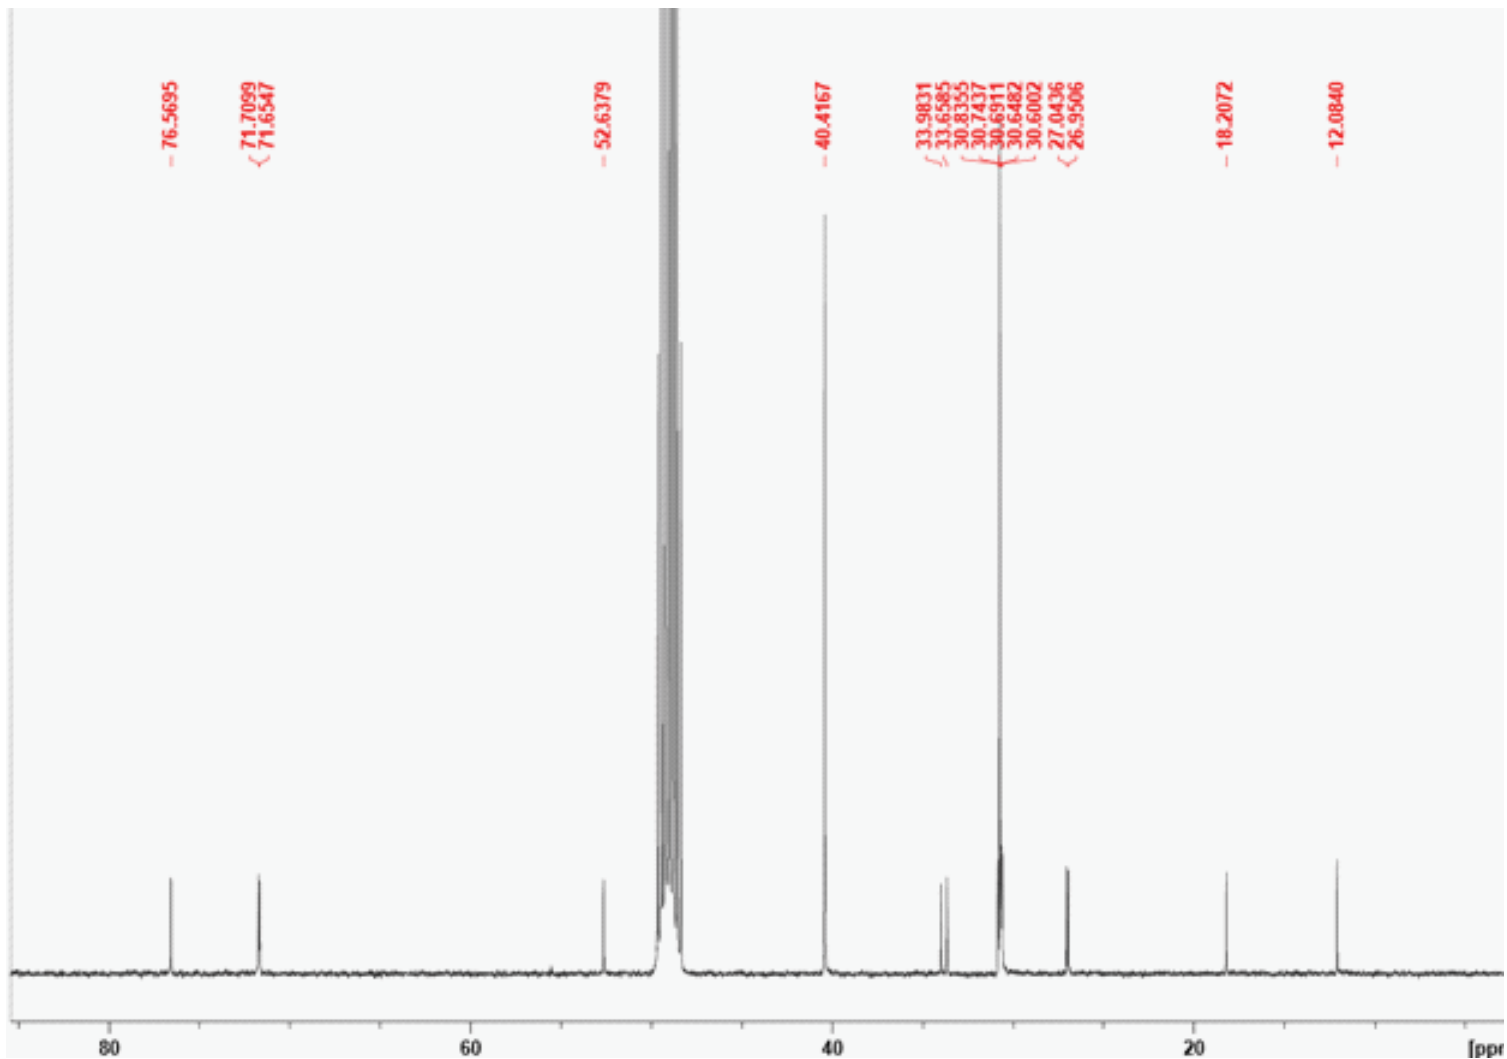

Figure S9

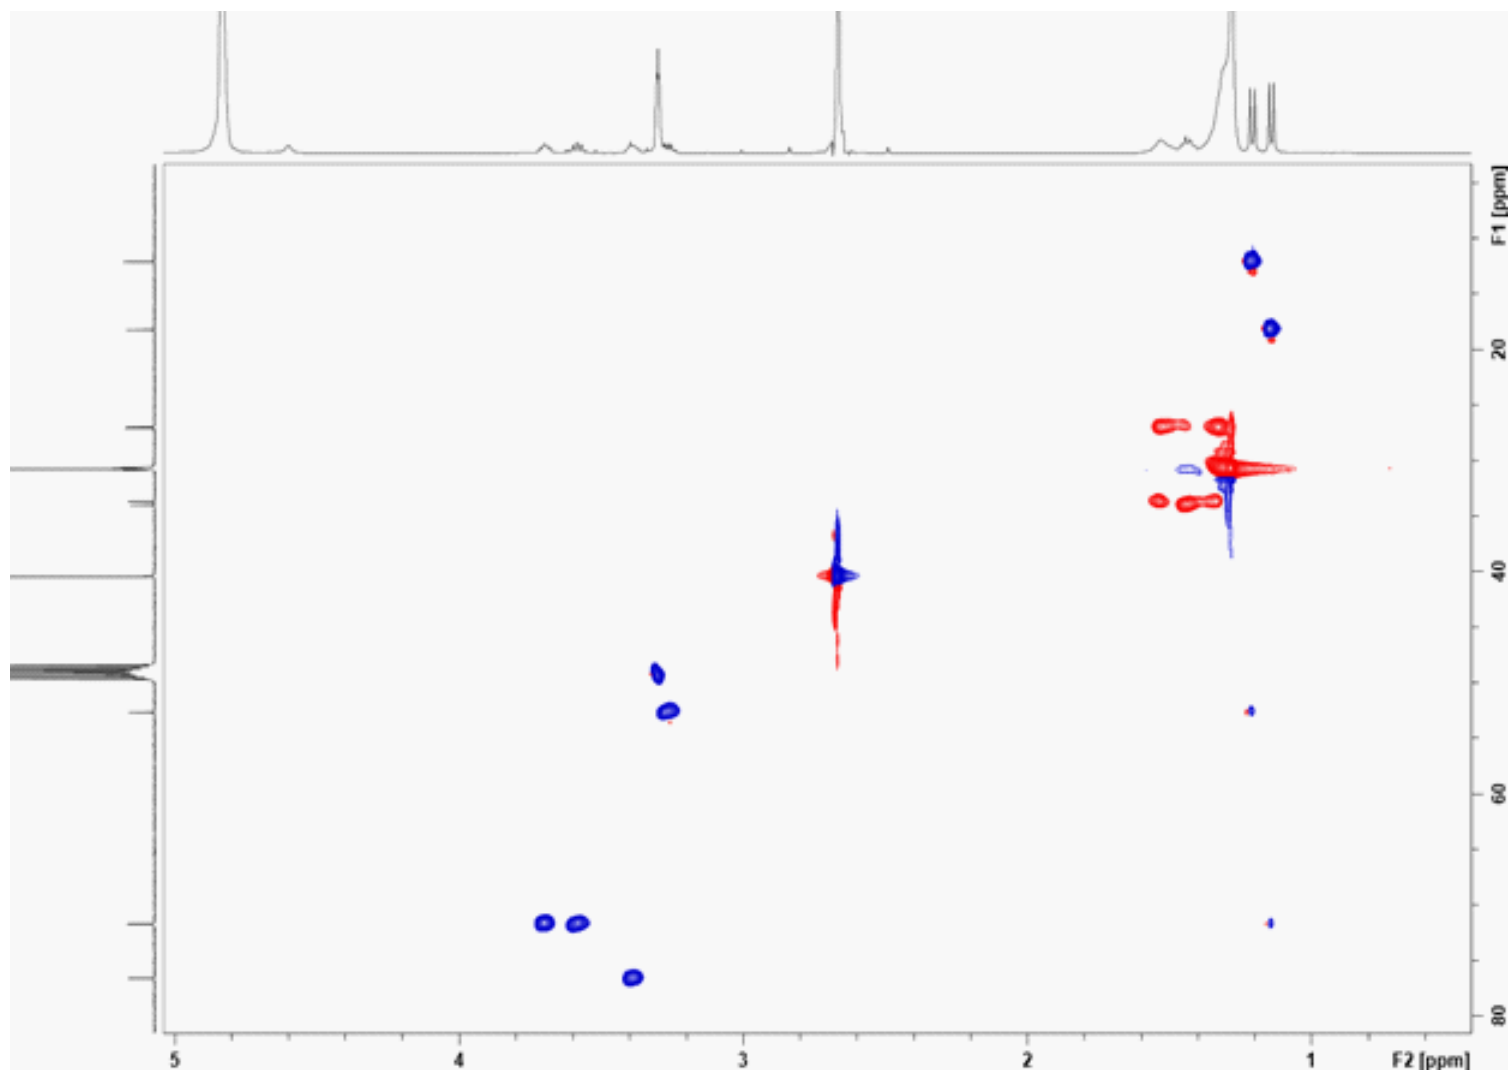

**Figure S10**

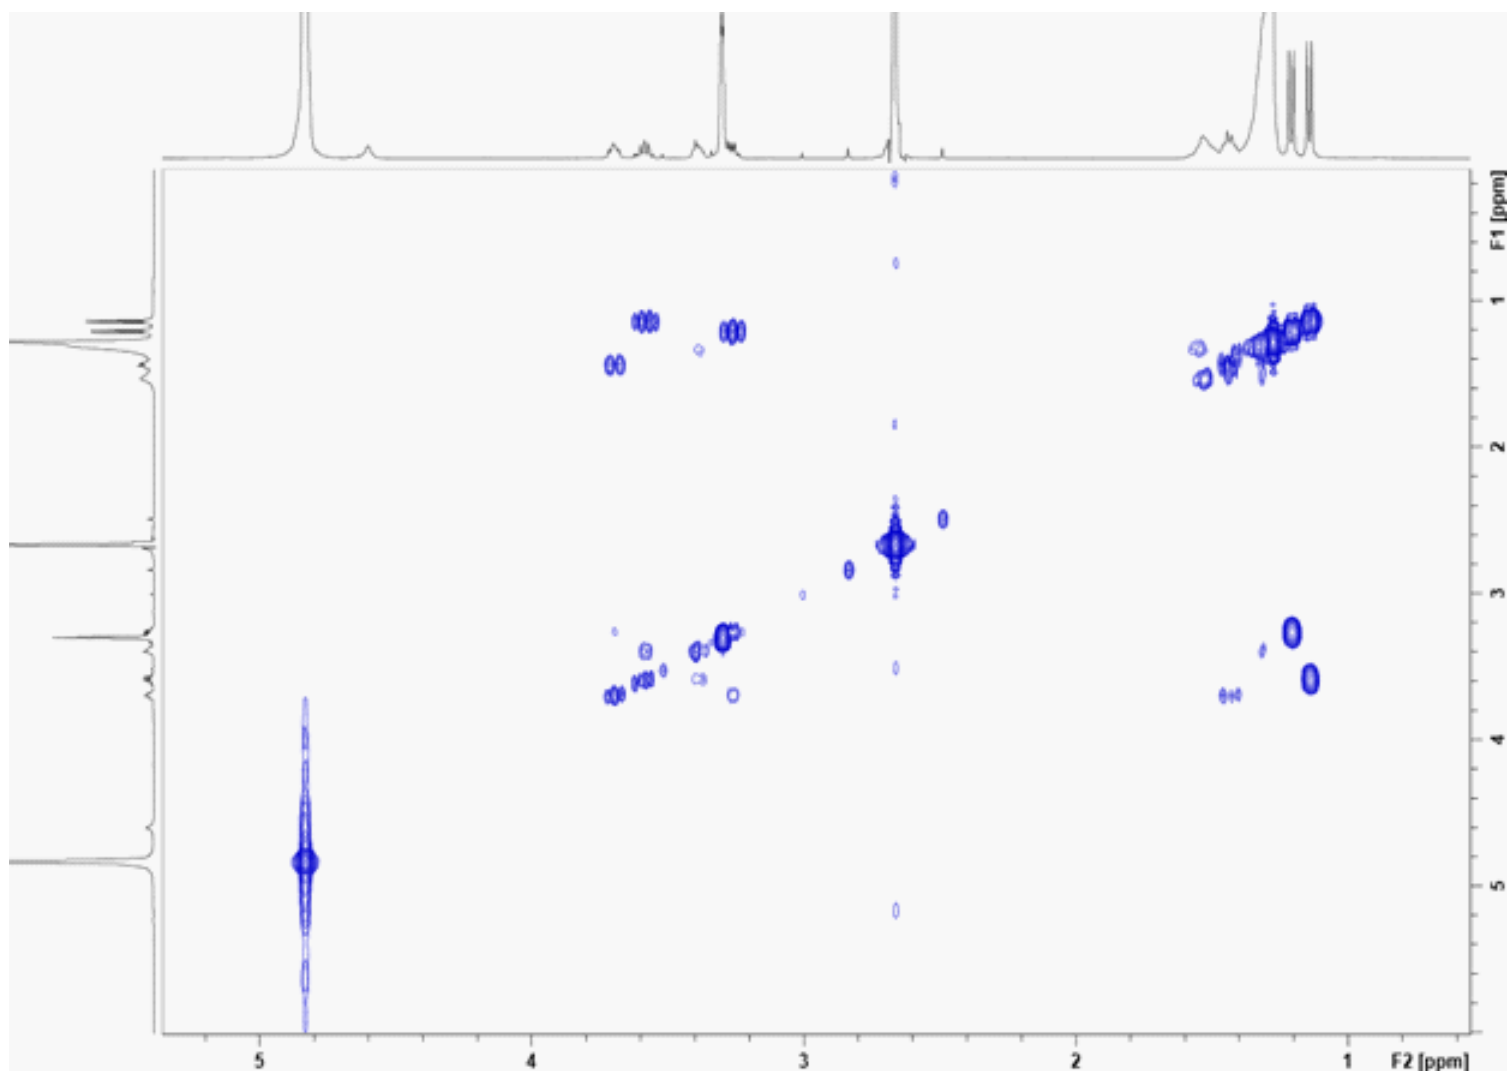

**Figure S11**

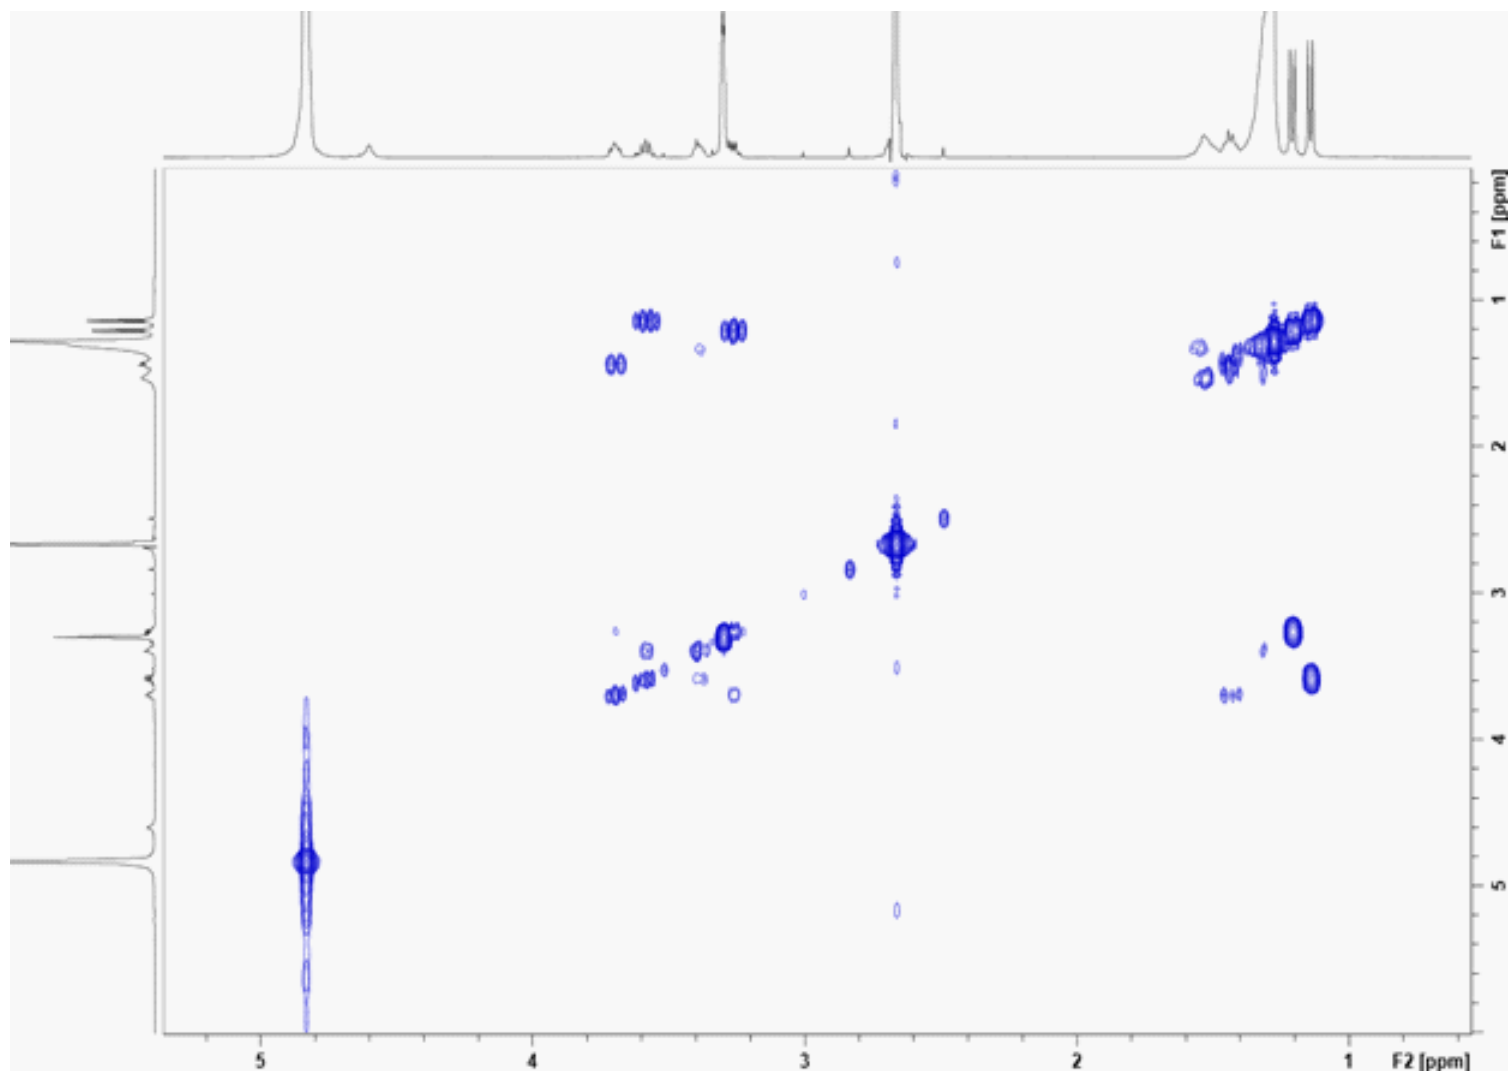

**Figure S12**



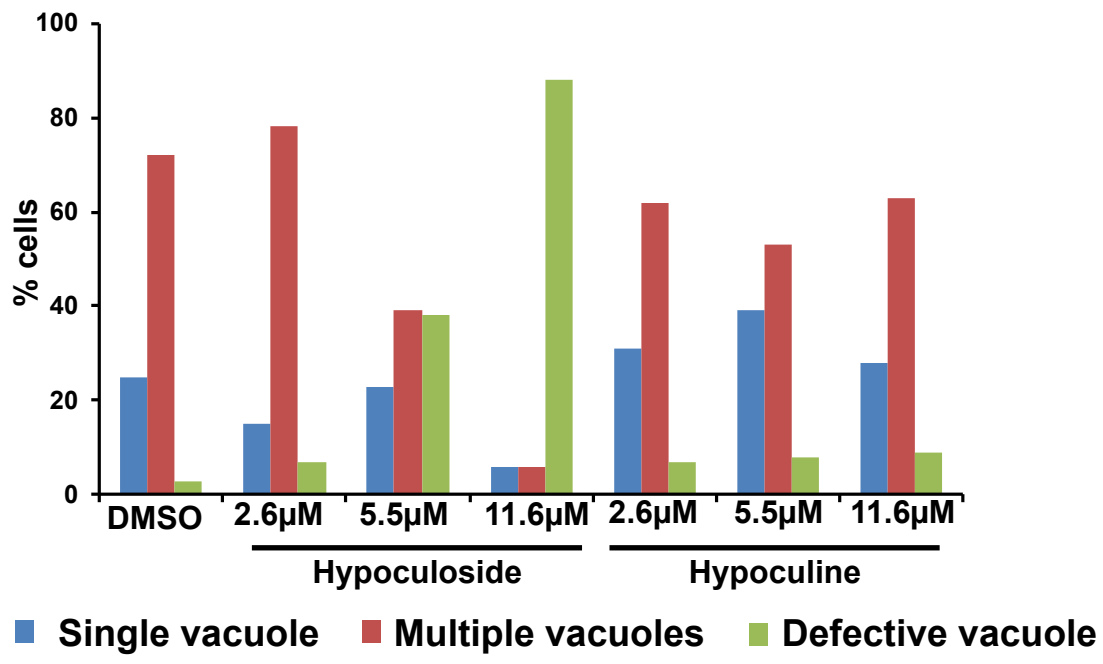

**Figure S13**

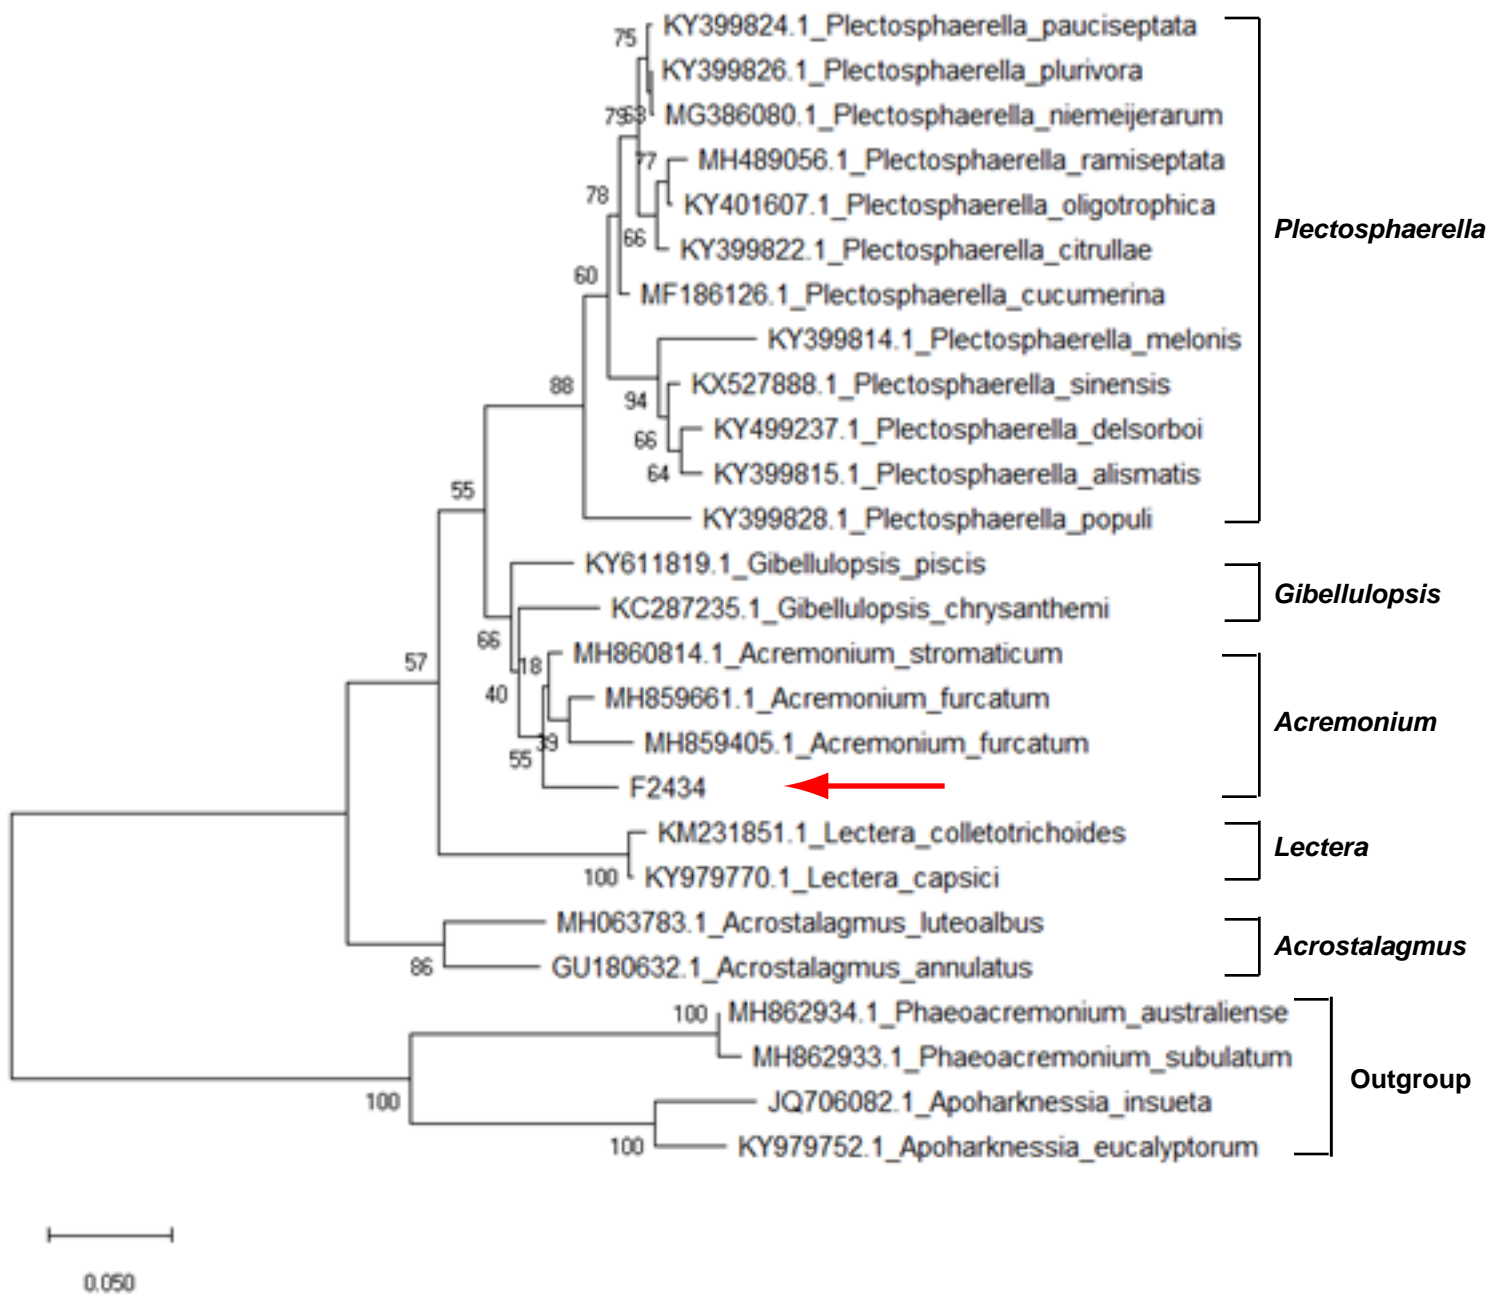

**Figure S14**
